# Supplementary material
Source: PubMed Central journal article supplement (PMC5490372)
Supplement: NIHMS867706-supplement-Supplemental_Information.pdf [file NIHMS867706-supplement-Supplemental_Information.pdf]

| Prob         | (0,0.2) |         | (0.2,0.4) |         | (0.4,0.6) |         | (0.6,1.0] |         | TMscore |
|--------------|---------|---------|-----------|---------|-----------|---------|-----------|---------|---------|
|              | native  | model_1 | native    | model_1 | native    | model_1 | native    | model_1 |         |
| <b>Ts761</b> | 0.26    | 0.26    | 0.45      | 0.43    | 0.58      | 0.57    | 1.00      | 1.00    | 0.751   |
| <b>Ts763</b> | 0.40    | 0.42    | 0.52      | 0.53    | 0.74      | 0.75    | 1.00      | 1.00    | 0.847   |
| <b>Ts767</b> | 0.16    | 0.16    | 0.42      | 0.42    | 0.65      | 0.65    | 1.00      | 1.00    | 0.915   |
| <b>Ts777</b> | 0.12    | 0.12    | 0.36      | 0.36    | 0.60      | 0.62    | 1.00      | 1.00    | 0.866   |
| <b>Ts785</b> | 0.33    | 0.34    | 0.49      | 0.51    | 0.63      | 0.62    | 1.00      | 1.00    | 0.823   |
| <b>Ts794</b> | 0.11    | 0.11    | 0.38      | 0.37    | 0.67      | 0.65    | 1.00      | 0.99    | 0.741   |
| <b>Ts800</b> | 0.26    | 0.27    | 0.41      | 0.41    | 0.72      | 0.69    | 1.00      | 0.99    | 0.874   |
| <b>Ts802</b> | 0.25    | 0.25    | 0.48      | 0.47    | 0.65      | 0.66    | 0.99      | 1.00    | 0.835   |
| <b>Ts806</b> | 0.20    | 0.20    | 0.41      | 0.42    | 0.63      | 0.63    | 1.00      | 1.00    | 0.876   |
| <b>Ts810</b> | 0.33    | 0.33    | 0.48      | 0.49    | 0.65      | 0.67    | 1.00      | 1.00    | 0.671   |
| <b>Ts812</b> | 0.20    | 0.21    | 0.44      | 0.45    | 0.55      | 0.55    | 1.00      | 1.00    | 0.837   |
| <b>Ts814</b> | 0.11    | 0.11    | 0.35      | 0.35    | 0.64      | 0.66    | 1.00      | 1.00    | 0.894   |
| <b>Ts818</b> | 0.35    | 0.35    | 0.45      | 0.46    | 0.62      | 0.64    | 1.00      | 0.99    | 0.640   |
| <b>Ts824</b> | 0.32    | 0.32    | 0.46      | 0.46    | 0.69      | 0.67    | 1.00      | 1.00    | 0.770   |
| <b>Ts827</b> | 0.23    | 0.25    | 0.39      | 0.40    | 0.62      | 0.62    | 1.00      | 0.99    | 0.580   |
| <b>Ts832</b> | 0.21    | 0.21    | 0.41      | 0.41    | 0.56      | 0.56    | 1.00      | 1.00    | 0.884   |
| <b>Ts835</b> | 0.11    | 0.11    | 0.34      | 0.34    | 0.62      | 0.62    | 1.00      | 1.00    | 0.861   |

Supplemental Table I: Frequency of NOE contact.

The probability (Prob) for each contact is assigned based on group size and confidence. The table shows the frequency of contact for each range of ambiguity (0,0.2), (0.2,0.4), (0.4,0.6) and (0.6,1.0]. The frequency of contact in native and model\_1 is nearly identical. Data for targets Ts804 and Ts826 is not shown, since the native is not yet released.
